# Supplementary material for: SBOL Visual: A Graphical Language for Genetic Designs
Source: PLOS journal article supplement (doi:10.1371/journal.pbio.1002310), 2015-12-03
Supplement: S3 (10.1371/journal.pbio.1002310.s003) [file journal.pbio.1002310.s003]

**Supplementary Table 1. SBOL Visual Symbols**

|                                                                                     |                                                                                                                                                                                                                                                                             |                                                                                     |                                                                                                                                                                                      |
|-------------------------------------------------------------------------------------|-----------------------------------------------------------------------------------------------------------------------------------------------------------------------------------------------------------------------------------------------------------------------------|-------------------------------------------------------------------------------------|--------------------------------------------------------------------------------------------------------------------------------------------------------------------------------------|
|    | <b>Promoter</b><br><i>The sequence at the beginning of a gene required for transcription initiation.</i><br>SO Accession: SO:0000167                                                                                                                                        |    | <b>Ribonuclease Site</b><br><i>A region of a transcript encoding the cleavage site for a ribonuclease enzyme.</i><br>SO Accession: SO:0001977                                        |
|    | <b>Operator</b><br><i>A transcription factor binding site.</i><br>SO Accession: SO:0000057                                                                                                                                                                                  |    | <b>RNA Stability Element</b><br><i>A variant that changes the stability of a transcript with respect to a reference sequence.</i><br>SO Accession: SO:0001546                        |
|    | <b>Coding Sequence (CDS)</b><br><i>A complete coding sequence, inclusive of the start and stop codons. A sequence of codons which encode an oligopeptide, often folds into a protein. May also include untranslated regions (e.g. introns).</i><br>SO Accession: SO:0000316 |    | <b>Protease Site</b><br><i>A polypeptide_region that codes for a protease cleavage site.</i><br>SO Accession: SO:0001956                                                             |
|  | <b>Ribosome Entry Site</b><br><i>This symbol represents a ribosome binding site in prokaryotes, an IRES in eukaryotic viruses, and Kozak sequence in eukaryotes.</i><br>SO Accession: SO:0000139                                                                            |  | <b>Protein Stability Element</b><br><i>A polypeptide region that proves structure in a protein that affects the stability of the protein.</i><br>SO Accession: SO:0001955            |
|  | <b>Terminator</b><br><i>A sequence which halts transcription, usually found at the end of a gene.</i><br>SO Accession: SO:0000141                                                                                                                                           |  | <b>Origin of Replication</b><br><i>The origin of replication; starting site for duplication of a nucleic acid molecule to give two identical copies.</i><br>SO Accession: SO:0000296 |
|  | <b>Insulator / Spacer</b><br><i>A sequence that provides genetic isolation between two or more contiguous components.</i><br>SO Accession: SO:0000627                                                                                                                       |  | <b>User Defined</b><br><i>A region of a DNA sequence not covered by other SBOL Visual symbols.</i><br>SO Accession: N/A                                                              |
