# Supplementary material for: SBOL Visual: A Graphical Language for Genetic Designs
Source: PLOS journal article supplement (doi:10.1371/journal.pbio.1002310), 2015-12-03
Supplement: S4 (10.1371/journal.pbio.1002310.s004) [file journal.pbio.1002310.s004]

**Supplementary Table 2: DNA Construction Symbols**

|                                                                                     |                                                                                                                                                                                                                                          |                                                                                     |                                                                                                                                                                                                                                                                                                                      |
|-------------------------------------------------------------------------------------|------------------------------------------------------------------------------------------------------------------------------------------------------------------------------------------------------------------------------------------|-------------------------------------------------------------------------------------|----------------------------------------------------------------------------------------------------------------------------------------------------------------------------------------------------------------------------------------------------------------------------------------------------------------------|
|    | <b>Primer Binding Site</b><br><i>Non-covalent primer binding site for initiation of replication, transcription, or reverse transcription.</i><br>SO Accession: SO:0005850                                                                |    | <b>5' Overhang</b><br><i>A terminal region of DNA sequence where the end of the region is not blunt ended and the exposed single strand terminates at the 5' end.</i><br>SO Accession: SO:0001932                                                                                                                    |
|    | <b>Restriction Enzyme Recognition Site</b><br><i>A binding site that, in the nucleotide molecule, interacts selectively and noncovalently with polypeptide residues of a restriction enzyme.</i><br>SO Accession: SO:0000061, SO:0001687 |    | <b>3' Overhang</b><br><i>A terminal region of DNA sequence where the end of the region is not blunt ended and the exposed single strand terminates at the 3' end.</i><br>SO Accession: SO:0001933                                                                                                                    |
|    | <b>5' Sticky restriction site</b><br><i>A restriction enzyme recognition site that, when cleaved, results in 5 prime overhangs.</i><br>SO Accession: SO:0001975                                                                          |    | <b>Assembly Junction / Assembly Scar</b><br><i>A region of DNA sequence formed from the ligation of two sticky ends where the palindrome is broken and no longer comprises the recognition site and thus cannot be re-cut by the restriction enzymes used to create the sticky ends.</i><br>SO Accession: SO:0001953 |
|  | <b>3' Sticky restriction site</b><br><i>A restriction enzyme recognition site that, when cleaved, results in 3 prime overhangs.</i><br>SO Accession: SO:0001976                                                                          |  | <b>Signature / Barcode</b><br><i>A region of sequence where developer information is encoded.</i><br>SO Accession: SO:0001978                                                                                                                                                                                        |
|  | <b>Restriction Site Resulting in No Overhang / Blunt Restriction Site</b><br><i>A restriction enzyme recognition site that, when cleaved, results in no overhangs.</i><br>SO Accession: SO:0001691                                       |                                                                                     |                                                                                                                                                                                                                                                                                                                      |
